# Supplementary material
Source: MDPI journal article supplement (https://www.mdpi.com/2218-2004/10/1/10)
Supplement: s1 [file s1]

**Electronic Supplementary Information for:**

**Exploring the excited-state nonadiabatic effects in the  
semisaturated planar tetracoordinated carbon molecule**

**$C_7H_4$**

Chithra M J, Probal Nag, Sai Vamsi Krishna Isukapalli, and Sivaranjana Reddy Vennapusa\*

School of Chemistry, Indian Institute of Science Education and Research  
Thiruvananthapuram, Maruthamala PO, Vithura, Thiruvananthapuram 695551, India.  
Email: siva@iisertvm.ac.in

## Table of contents

**Table S1:** Harmonic vibrational frequencies of  $\text{C}_7\text{H}_4$  calculated at B3LYP/6-311++G(d,p) level of theory.

**Table S2:** Ground-state ( $S_0$ ) equilibrium geometry of  $\text{C}_7\text{H}_4$  optimized at B3LYP/6-311++G(d,p) level of theory.

**Table S3:** Linear intrastate coupling parameters ( $\kappa$ ) for the singlet electronic states of  $\text{C}_7\text{H}_4$  calculated at (TD) $\omega$ B97XD/6-311++G(d,p) level of theory.

**Table S4:** Quadratic intrastate coupling parameters ( $\gamma$ ) for the singlet electronic states of  $\text{C}_7\text{H}_4$  calculated at (TD) $\omega$ B97XD/6-311++G(d,p) level of theory.

**Table S5:** Linear interstate coupling parameters ( $\lambda$ ) computed along  $a_2$  modes for the singlet electronic states of  $\text{C}_7\text{H}_4$  calculated at (TD) $\omega$ B97XD/6-311++G(d,p) level of theory.

**Table S6:** Linear interstate coupling parameters ( $\lambda$ ) computed along  $a_1$  modes for the singlet electronic states of  $\text{C}_7\text{H}_4$  calculated at (TD) $\omega$ B97XD/6-311++G(d,p) level of theory.

**Table S7:** MCTDH details of  $S_1$ - $S_2$ - $S_3$  vibronic dynamics of  $\text{C}_7\text{H}_4$ .

**Figure S1:** Nuclear densities variation of the singlet excited states of  $\text{C}_7\text{H}_4$  with the wavepacket evolving on  $S_1$  state.

**Table S1:** Symmetry and harmonic frequency ( $\omega$ ) of the vibrational modes of C<sub>7</sub>H<sub>4</sub> at B3LYP/6-311++G(d,p) level of theory.

| No.(Sym.)                    | Freq (in cm <sup>-1</sup> ) |
|------------------------------|-----------------------------|
| $\nu_1$ (A <sub>2</sub> )    | 94.7224                     |
| $\nu_2$ (B <sub>1</sub> )    | 270.633                     |
| $\nu_3$ (A <sub>2</sub> )    | 330.7573                    |
| $\nu_4$ (A <sub>1</sub> )    | 469.7463                    |
| $\nu_5$ (B <sub>1</sub> )    | 525.6469                    |
| $\nu_6$ (B <sub>2</sub> )    | 553.6491                    |
| $\nu_7$ (B <sub>2</sub> )    | 615.8429                    |
| $\nu_8$ (A <sub>1</sub> )    | 645.2011                    |
| $\nu_9$ (B <sub>1</sub> )    | 783.8379                    |
| $\nu_{10}$ (B <sub>2</sub> ) | 799.5259                    |
| $\nu_{11}$ (A <sub>1</sub> ) | 836.9950                    |
| $\nu_{12}$ (B <sub>2</sub> ) | 901.4518                    |
| $\nu_{13}$ (A <sub>1</sub> ) | 917.5521                    |
| $\nu_{14}$ (A <sub>2</sub> ) | 1008.0332                   |
| $\nu_{15}$ (A <sub>1</sub> ) | 1155.5285                   |
| $\nu_{16}$ (B <sub>1</sub> ) | 1158.9089                   |
| $\nu_{17}$ (A <sub>2</sub> ) | 1241.0244                   |
| $\nu_{18}$ (A <sub>1</sub> ) | 1287.1241                   |
| $\nu_{19}$ (B <sub>2</sub> ) | 1310.9198                   |
| $\nu_{20}$ (B <sub>2</sub> ) | 1467.2474                   |
| $\nu_{21}$ (A <sub>1</sub> ) | 1485.3490                   |
| $\nu_{22}$ (A <sub>1</sub> ) | 1717.8870                   |
| $\nu_{23}$ (B <sub>2</sub> ) | 1728.9691                   |
| $\nu_{24}$ (B <sub>2</sub> ) | 3054.5545                   |
| $\nu_{25}$ (A <sub>1</sub> ) | 3059.9059                   |
| $\nu_{26}$ (A <sub>2</sub> ) | 3085.1980                   |
| $\nu_{27}$ (B <sub>1</sub> ) | 3102.6907                   |

**Table S2:** Ground-state ( $S_0$ ) equilibrium geometry of  $C_7H_4$  optimized at B3LYP/6-311++G(d,p) level of theory.

| Atom | Coordinates (Angstroms) |           |           |
|------|-------------------------|-----------|-----------|
|      | X                       | Y         | Z         |
| C    | 0.000000                | 0.000000  | 1.021207  |
| C    | 0.000000                | 1.104283  | 0.103105  |
| C    | -0.000000               | -1.104283 | 0.103105  |
| C    | 0.000000                | 0.787934  | -1.364183 |
| C    | -0.000000               | -0.787934 | -1.364183 |
| C    | 0.000000                | -1.511469 | 1.369436  |
| C    | 0.000000                | 1.511469  | 1.369436  |
| H    | -0.879753               | 1.208785  | -1.856883 |
| H    | 0.879753                | 1.208785  | -1.856883 |
| H    | 0.879753                | -1.208785 | -1.856883 |
| H    | -0.879753               | -1.208785 | -1.856883 |

**Table S3:** Linear intrastate coupling parameters ( $\kappa$ ) (in eV) for the singlet electronic states of  $C_7H_4$  obtained at (TD) $\omega$ B97XD/6-311++G(d,p) level of theory. Excitation strength ( $\kappa^2/2\omega^2$ ) obtained for each vibrational mode is shown in parenthesis.

| a <sub>1</sub> mode<br>(Freq, eV) | $\kappa^{S_1}$   | $\kappa^{S_2}$   | $\kappa^{S_3}$   |
|-----------------------------------|------------------|------------------|------------------|
| $\nu_4$ (0.0582)                  | -0.0745 (0.8183) | 0.0223 (0.0731)  | -0.1152 (1.9603) |
| $\nu_8$ (0.0800)                  | -0.2542 (5.0466) | 0.0637 (0.3168)  | 0.0204 (0.0325)  |
| $\nu_{11}$ (0.1038)               | -0.0040 (0.0008) | -0.0191 (0.0170) | 0.0026 (0.0003)  |
| $\nu_{13}$ (0.1138)               | 0.0183 (0.0129)  | 0.0085 (0.0028)  | -0.0648 (0.1620) |
| $\nu_{15}$ (0.1433)               | -0.5829 (8.2728) | -0.0452 (0.0497) | -0.3079 (2.3085) |
| $\nu_{18}$ (0.1596)               | -0.0867 (0.1475) | -0.0098 (0.0019) | -0.0379 (0.0282) |
| $\nu_{21}$ (0.1842)               | 0.0288 (0.0122)  | 0.0109 (0.0018)  | 0.0245 (0.0089)  |
| $\nu_{22}$ (0.2130)               | -0.0287 (0.0091) | 0.0165 (0.0030)  | 0.1672 (0.3083)  |
| $\nu_{25}$ (0.3794)               | 0.0250 (0.0022)  | 0.0168 (0.0010)  | -0.0041 (0.0001) |

**Table S4:** Quadratic intrastate coupling parameters ( $\gamma$ ) (in eV) for the singlet electronic states of  $C_7H_4$  obtained at (TD) $\omega$ B97XD/6-311++G(d,p) level of theory.

| a <sub>1</sub> mode<br>(Freq, eV) | $\gamma^{S_1}$ | $\gamma^{S_2}$ | $\gamma^{S_3}$ |
|-----------------------------------|----------------|----------------|----------------|
| $\nu_4$ (0.0582)                  | -0.0387        | 0.0735         | -0.0265        |
| $\nu_8$ (0.0800)                  | -0.1431        | 0.0904         | -0.0417        |
| $\nu_{11}$ (0.1038)               | -0.0025        | -0.0050        | -0.0081        |
| $\nu_{13}$ (0.1138)               | -0.0001        | 0.0004         | -0.0302        |
| $\nu_{15}$ (0.1433)               | 0.0148         | -0.0111        | -0.0932        |
| $\nu_{18}$ (0.1596)               | -0.0117        | 0.0020         | -0.0211        |
| $\nu_{21}$ (0.1842)               | -0.0008        | 0.0021         | -0.0083        |
| $\nu_{22}$ (0.2130)               | -0.0891        | 0.0725         | -0.0031        |
| $\nu_{25}$ (0.3794)               | -0.0092        | -0.0010        | -0.0015        |

**Table S5:** Linear interstate coupling parameters ( $\lambda$ ) (in eV) computed along  $a_2$  modes for singlet electronic states of  $C_7H_4$  obtained at (TD) $\omega$ B97XD/6-311++G(d,p) level of theory. Excitation strength ( $\lambda^2/2\omega^2$ ) obtained for each vibrational mode is shown in paranthesis.

| $a_2$ mode<br>(Freq, eV) | $\lambda_{S_1-S_3}$ | $\lambda_{S_2-S_3}$ |
|--------------------------|---------------------|---------------------|
| $\nu_1$ (0.0117)         | 0.1443 (76.0236)    | 0.1137 (47.2600)    |
| $\nu_3$ (0.0410)         | 0.2055 (12.5575)    | 0.2049 (12.4839)    |
| $\nu_{14}$ (0.1250)      | 0.0437 (0.0612)     | 0.0349 (0.0389)     |
| $\nu_{17}$ (0.1539)      | 0.0640 (0.0864)     | 0.0450 (0.0427)     |
| $\nu_{26}$ (0.3825)      | 0.0509 (0.0088)     | 0.0265 (0.0024)     |

**Table S6:** Linear interstate coupling parameters ( $\lambda$ ) (in eV) computed along  $a_1$  modes for the singlet electronic states of  $C_7H_4$  obtained at (TD) $\omega$ B97XD/6-311++G(d,p) level of theory. Excitation strength ( $\lambda^2/2\omega^2$ ) obtained for each vibrational mode is shown in paranthesis.

| $a_1$ mode<br>(Freq, eV) | $\lambda_{S_1-S_2}$ |
|--------------------------|---------------------|
| $\nu_4$ (0.0582)         | 0.2340 (8.0826)     |
| $\nu_8$ (0.0800)         | 0.4439 (15.3924)    |
| $\nu_{11}$ (0.1038)      | 0.0708 (0.2327)     |
| $\nu_{13}$ (0.1138)      | 0.0592 (0.1355)     |
| $\nu_{15}$ (0.1433)      | 0.5087 (6.3013)     |
| $\nu_{18}$ (0.1596)      | 0.1755 (0.6043)     |
| $\nu_{21}$ (0.1842)      | 0.0820 (0.0992)     |
| $\nu_{22}$ (0.2130)      | 0.1578 (0.2743)     |
| $\nu_{25}$ (0.3794)      | 0.0623 (0.0135)     |

**Table S7:** MCTDH details of normal modes combination, size of the primitive and single particle bases used in the  $S_1$ - $S_2$ - $S_3$  vibronic dynamics of  $C_7H_4$ .

| Normal modes                     | Primitive basis | SPF         |
|----------------------------------|-----------------|-------------|
| $(\nu_1, \nu_3, \nu_4)$          | (8, 10, 9)      | [9, 6, 10]  |
| $(\nu_8, \nu_{11}, \nu_{13})$    | (9, 5, 6)       | [9, 7, 6]   |
| $(\nu_{14}, \nu_{15}, \nu_{17})$ | (6, 10, 6)      | [12, 6, 11] |
| $(\nu_{18}, \nu_{21}, \nu_{22})$ | (6, 5, 6)       | [6, 4, 7]   |
| $(\nu_{25}, \nu_{26})$           | (4, 5)          | [4, 4, 4]   |

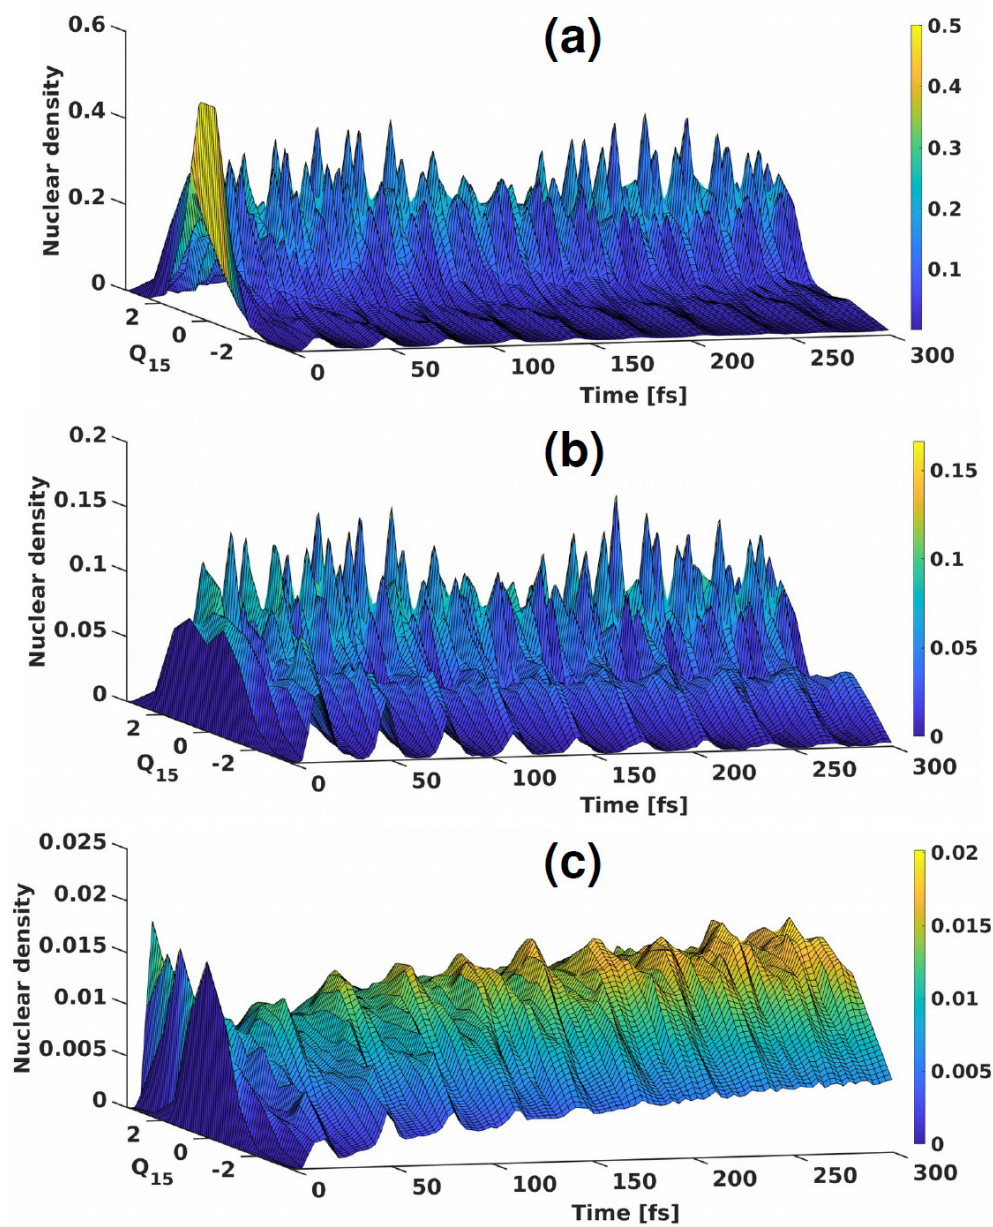

**Figure S1:** Nuclear densities variation of (a)  $S_1$ , (b)  $S_2$  and (c)  $S_3$  along  $Q_{15}$  of  $C_7H_4$  obtained by propagating initial wavepacket on the  $S_1$  state.
